# Supplementary material for: Effect of Aromatic Herbs and Spices Present in the Mediterranean Diet on the Glycemic Profile in Type 2 Diabetes Subjects: A Systematic Review and Meta-Analysis
Source: MDPI journal article supplement (doi:10.3390/nu16060756), 2024-03-07
Supplement: s1 [file s1]

**Supplemental Table 2.** Articles included in the systematic review which do not meet the inclusion criteria to be included in the meta-analysis study.

| First author, year of publication        | N   | Participants                                                                                                                                                                                                                                                                               | Male, n (%) | Age, years      | Study design                                                                                                                                                                                                                                                                                                            | Intervention dose mg/day (number of subjects)                                                                                                                                                                                                                                                                                                                                    | Duration (days) | Body weight (kg) |                   | Glucose (mg/dL)  |                    | Hb1Ac, (%)      |                   | Insulin (UI/ $\mu$ L)  |                          | Quality checklist mean |
|------------------------------------------|-----|--------------------------------------------------------------------------------------------------------------------------------------------------------------------------------------------------------------------------------------------------------------------------------------------|-------------|-----------------|-------------------------------------------------------------------------------------------------------------------------------------------------------------------------------------------------------------------------------------------------------------------------------------------------------------------------|----------------------------------------------------------------------------------------------------------------------------------------------------------------------------------------------------------------------------------------------------------------------------------------------------------------------------------------------------------------------------------|-----------------|------------------|-------------------|------------------|--------------------|-----------------|-------------------|------------------------|--------------------------|------------------------|
|                                          |     |                                                                                                                                                                                                                                                                                            |             |                 |                                                                                                                                                                                                                                                                                                                         |                                                                                                                                                                                                                                                                                                                                                                                  |                 | Baseline         | Final             | Baseline         | Final              | Baseline        | Final             | Baseline               | Final                    |                        |
| <b>Moghadam <i>et al.</i>, 2021</b>      | 60  | T2DM obese men, 30–50 years, BMI > 30 kg/m <sup>2</sup> , T2DM duration >2 years. Exclusion criteria were hepatic, renal, bone and CVD, severe hypertension, having chronic complications of diabetes and taking medications except for oral hypoglycaemic agents.                         | 60 (100)    | 39 $\pm$ 5      | Randomized, double-blind and parallel prospective clinical trial. Participants were randomly divided to four groups: training + placebo (CT; n = 15), saffron (S; n = 15), training + saffron (CTS; n = 15) or control (CON; n = 15). Training exercise include warm-up (5-10 min) and 1-1.5 h/day of HIIT with lifting | <u>Group CT</u> (n = 15) training + placebo: received one pill of 100 mg of maltodextrin daily.<br><u>Group S</u> (N=15) received one pill of 100 mg of pure saffron daily<br><u>Group CT</u> (n = 15) training + saffron: received one pill of 100 mg of saffron daily.<br><u>Control group</u> did not receive any pill and were asked to maintain a normal daily life pattern | 84 days         | 93.9 $\pm$ 6     | <0.001            | NR               | <0.001             | NR              | <0.001            | NR                     | <0.001                   | 0.695                  |
|                                          |     |                                                                                                                                                                                                                                                                                            |             |                 |                                                                                                                                                                                                                                                                                                                         |                                                                                                                                                                                                                                                                                                                                                                                  |                 |                  | <0.001            | NR               | <0.001             | NR              | <0.001            | NR                     | <0.001                   |                        |
|                                          |     |                                                                                                                                                                                                                                                                                            |             |                 |                                                                                                                                                                                                                                                                                                                         |                                                                                                                                                                                                                                                                                                                                                                                  |                 |                  | <0.001            | NR               | <0.001             | NR              | <0.001            | NR                     | <0.001                   |                        |
|                                          |     |                                                                                                                                                                                                                                                                                            |             |                 |                                                                                                                                                                                                                                                                                                                         |                                                                                                                                                                                                                                                                                                                                                                                  |                 |                  | NSD               | NR               | NSD                | NR              | NSD               | NR                     | NSD                      |                        |
| <b>Assaad-Khalil <i>et al.</i>, 2022</b> | 232 | T2DM who have not received any previous antidiabetic medications. Exclusion criteria were pregnant or breast-feeding women, BMI >40 Kg/m <sup>2</sup> or < 18.5 Kg/m <sup>2</sup> ; eGFR <60 mL/min/1.73m <sup>2</sup> , infection diseases, T1DM, or diabetic complications among others. | 23 (35.9)   | 49 (16)         | Double-blind, double-dummy, randomized, active-controlled, parallel-group, interventional, phase 2 clinical trial. Eligible patients were randomized group 1 who received metformin; group 2, who received low-dose NW Low-Glu® and group three, who received high-dose NW Low-Glu®.                                    | <u>Group 1:</u> (N=64) received 2000 mg of metformin per day<br><u>Group 2:</u> (N=65): low-dose NW Low-Glu, which contained 1200 mg Mas Cotek, 400 mg Cinnamomum and 1000 mg black seed<br><u>Group 2:</u> (N=65): high-dose NW Low-Glu., which contained 1500 mg Mas Cotek, 500 mg Cinnamomum and 1250 mg black seed                                                           | 84 days         | 91.2 (10.6)      | 90.4 (10.9) *     | 162.9 (62.6)     | 154.5 (68.5)       | 8.7 (1.9)       | 7.7 (1.6) *       | NR                     | NR                       | 0.803                  |
|                                          |     |                                                                                                                                                                                                                                                                                            | 32 (49.2)   | 50 (14)         |                                                                                                                                                                                                                                                                                                                         |                                                                                                                                                                                                                                                                                                                                                                                  |                 |                  | 88.4 (12.5)       | 87.5 (12.8) *    | 158.4 (72.7)       | 144.8 (53.6)    | 8.5 (1.4)         | 7.8 (1.6) *            | NR                       | NR                     |
|                                          |     |                                                                                                                                                                                                                                                                                            | 32 (46.4)   | 39 (13.5)       |                                                                                                                                                                                                                                                                                                                         |                                                                                                                                                                                                                                                                                                                                                                                  |                 |                  | 85.6 (12.5)       | 84.5 (12.2) *    | 169.5 (71.7)       | 159.2 (50.4)    | 8.8 (1.9)         | 8.1 (1.8) *            | NR                       | NR                     |
| <b>Quirarte-Baez <i>et al.</i>, 2019</b> | 40  | T2DM treatment with metformin and glibenclamide. 27.5% of them have dyslipidemia                                                                                                                                                                                                           | 13 (32.5)   | 56.3 $\pm$ 9.97 | Intervention one arm, no-randomized and no-blind study                                                                                                                                                                                                                                                                  | Each patient was provided with a box containing 30 sachets of rosemary leaves (2g). The patients must add a bag in litter of boiling water (boiled for 3 min). Patients must drink this water during the day                                                                                                                                                                     | 90 days         | 74.4 $\pm$ 14.2  | 73.5 $\pm$ 14.7   | 181.2 $\pm$ 80.8 | 163.0 $\pm$ 72.9   | 9.09 $\pm$ 2.72 | 7.72 $\pm$ 1.82 * | 2.29 $\pm$ 0.98 mUI/mL | 1.12 $\pm$ 0.75 mUI/mL * | 0.250                  |
| <b>Moustafa <i>et al.</i>, 2019</b>      | 44  | T2DM subjects 18–60 years and T2DM diagnosed within a time duration $\leq$ 168 days. Other antidiabetic medications, pregnant and                                                                                                                                                          | 7 (24.1)    | NR              | Prospective, open-label randomized clinical trial. Eligible patients were randomly in two groups: Group I: received metformin while Group II: received                                                                                                                                                                  | <u>Group I</u> (N=23): received metformin tablets 2000 mg per day<br><u>Group II</u> (N=21): received Black cumin oil capsules (Baraka) 450 mgs three times daily                                                                                                                                                                                                                | 84 days         | 87.7 $\pm$ 17.0  | 83.3 $\pm$ 15.4 * | 166.2 $\pm$ 52.8 | 120.7 $\pm$ 25.4 * | 7.58 $\pm$ 1.63 | 6.55 $\pm$ 0.72 * | 12.7 $\pm$ 5.9         | 11.5 $\pm$ 5.3           | 0.696                  |
|                                          |     |                                                                                                                                                                                                                                                                                            | 11 (30.6)   | NR              |                                                                                                                                                                                                                                                                                                                         |                                                                                                                                                                                                                                                                                                                                                                                  |                 | 86.9 $\pm$ 17.9  | 84.4 $\pm$ 17.1 * | 142.5 $\pm$ 50.4 | 119.8 $\pm$ 23.7 * | 7.44 $\pm$ 1.16 | 7.01 $\pm$ 0.83   | 18.2 $\pm$ 12.9        | 16.5 $\pm$ 13.1          |                        |

|                               |    |                                                                                                                                                                                            |           |              |                                                                                                                                                                                                                                                                                     |                                                                                                                                                                                                                                                                 |                                                           |                                 |                                 |                 |                                  |             |              |                              |                                 |       |
|-------------------------------|----|--------------------------------------------------------------------------------------------------------------------------------------------------------------------------------------------|-----------|--------------|-------------------------------------------------------------------------------------------------------------------------------------------------------------------------------------------------------------------------------------------------------------------------------------|-----------------------------------------------------------------------------------------------------------------------------------------------------------------------------------------------------------------------------------------------------------------|-----------------------------------------------------------|---------------------------------|---------------------------------|-----------------|----------------------------------|-------------|--------------|------------------------------|---------------------------------|-------|
|                               |    | lactating women among others were excluded.                                                                                                                                                |           |              | Black cumin oil capsules three times daily.                                                                                                                                                                                                                                         |                                                                                                                                                                                                                                                                 |                                                           |                                 |                                 |                 |                                  |             |              |                              |                                 |       |
| Bamosa <i>et al.</i> , 2010   | 94 | T2DM uncontrolled diabetes, with several Hb1Ac>7%, age 18–60 years, treated only with oral hypoglycemic drugs. Patients with chronic cardiac, hepatic and renal illness                    | 14 (46.7) | 47.80±1.42   | Intervention study. All patients were divided in three groups, which received 3 different oral doses of Black cumin (1 g, 2 g, and 3 g per day)                                                                                                                                     | Group 1: received 1g of Black cumin per day                                                                                                                                                                                                                     | 84 days                                                   | 33.6 ± 1.53 kg/m <sup>2†</sup>  | 33.3 ± 1.53 kg/m <sup>2†</sup>  | 189 ± 14.3      | 171 ± 7.8                        | 8.36 ± 0.31 | 8.01 ± 0.27  | NR                           | NR                              | 0.452 |
|                               |    |                                                                                                                                                                                            | 14 (43.8) | 49.63±0.97   |                                                                                                                                                                                                                                                                                     | Group 2: received 2 g of Black cumin per day                                                                                                                                                                                                                    |                                                           | 28.9 ± 0.95 kg/m <sup>2†</sup>  | 29.4 ± 0.94 kg/m <sup>2†</sup>  | 219 ± 12.3      | 162 ± 9.2*                       | 9.09 ± 0.24 | 7.57 ± 0.30* | NR                           | NR                              |       |
|                               |    |                                                                                                                                                                                            | 15 (46.9) | 44.91±1.88   |                                                                                                                                                                                                                                                                                     | Group 3: received 3g of Black cumin per day                                                                                                                                                                                                                     |                                                           | 31.63 ± 1.47 kg/m <sup>2†</sup> | 31.61 ± 1.50 kg/m <sup>2†</sup> | 204 ± 18.2      | 169 ± 16.4*                      | 9.35 ± 0.41 | 7.31 ± 0.37* | NR                           | NR                              |       |
| El-Shamy <i>et al.</i> , 2011 | 66 | This study included 41 T2DM subjects without diabetic complication and 25 healthy non-diabetic subjects                                                                                    | NR        | NR           | Intervention study. T2DM subjects received Black cumin plus their oral antidiabetic drug, while healthy subjects only received Black cumin.                                                                                                                                         | T2DM group (N=41): 2.5 grams of N. sativa + their oral antidiabetic drug per day                                                                                                                                                                                | 168 days                                                  | NR                              | NR                              | 148.7 ± 26.59   | 127.6 7 ± 22.01*                 | 7.18 ± 0.83 | 6.02 ± 0.58* | NR                           | NR                              | 0.372 |
|                               |    |                                                                                                                                                                                            | NR        | NR           |                                                                                                                                                                                                                                                                                     | Healthy group (N=25): 2.5 grams of N. sativa per day                                                                                                                                                                                                            |                                                           | NR                              | NR                              | 80.22 ± 10.8    | 73.34 ± 8.71*                    | 4.43 ± 0.36 | 4.14 ± 0.47* | NR                           | NR                              |       |
| Bilal <i>et al.</i> , 2019    | 75 | T2DM subjects, FGB more than normal values, age 30-60 years, not insulin therapy and not another chronic disease.                                                                          | 31 (41.5) | 47.80 ± 1.10 | Intervention study one arm. T2DM subjects received Black cumin treatment for first 40 days and placebo treatment for another 40 days. Only 41 subjects completed the study                                                                                                          | Black cumin treatment included 0.7 g of seeds of Black cumin per day.                                                                                                                                                                                           | 80 days (40 days with N. sativa and 40 days with placebo) | NR                              | NR                              | 190.780 ± 8.042 | 168.317 ± 7.150* after N. sativa | NR          | NR           | 186.487 ±7.491               | 13.194 ±1 .404* after N. sativa | 0.464 |
|                               |    |                                                                                                                                                                                            |           |              |                                                                                                                                                                                                                                                                                     |                                                                                                                                                                                                                                                                 |                                                           |                                 |                                 |                 | 186.487±7 .491 after placebo     |             |              | 8.850 ± 0.694* after placebo |                                 |       |
| Ali <i>et al.</i> ,           | 60 | T2D subjects with HbA1c ≥ 7 % and ≤ 7.5 %, aged 18- 65, BMI 18- 30 kg/m <sup>2</sup> , and stable dose of metformin (1000 mg/day) for the last 84 days.                                    | 9 (69.2)  | 50 ± 3.1     | A randomized, open label, prospective, three-arm, parallel, multicenter study. All T2DM subjects were randomized in 3 arms: Test arm 1 (T1), Test arm 2 (T2), and reference arm 3 (R). Out of 60 patients, 45 patients completed the study (T1 (n = 13), T2 (n = 18) and R (n = 14) | Test arm 1 (N=13): received 1 tablet of metformin 1000 mg once daily and 1 tablet of Thymoquinone 50 mg                                                                                                                                                         | 90 days                                                   | 63.3 ± 3.1                      | NR                              | 144.0 ± 21.6    | 114.3 ± 8.6                      | 7.2 (0.1)   | 6.7 (0.1)    | NR                           | NR                              | 0.416 |
|                               |    |                                                                                                                                                                                            | 8 (44.4)  | 48 ± 2.5     |                                                                                                                                                                                                                                                                                     | Test arm 2 (N=18): received 1 tablet of metformin 1000 mg and 2 tablets of Thymoquinone 50 mg                                                                                                                                                                   |                                                           | 65.8 ± 2.3                      | NR                              | 118.0 ± 5.6     | 103.2 ± 4.4                      | 7.2 (0.1)   | 6.8 (0.1)    | NR                           | NR                              |       |
|                               |    |                                                                                                                                                                                            | 9 (64.3)  | 49 ± 1.7     |                                                                                                                                                                                                                                                                                     | Test arm 3 (N=14): received only 1 tablet of metformin 1000 mg                                                                                                                                                                                                  |                                                           | 67.0 ± 2.4                      | NR                              | 129.7 ± 6.9     | 111.4 ± 6.3                      | 7.3 (0.1)   | 7.1 (0.1)    | NR                           | NR                              |       |
| Zarvandi <i>et al.</i> , 2017 | 30 | T2DM subjects with T2DM diagnosed at least for 2 years duration, > 25 years, LDL>100mg/dL, TG>150 mg/dL and taking statins and hypoglycemic drugs. T1DM, pregnancy, insulin therapy, renal | 11 (36.7) | 56 ± 8       | The open-label Phase I clinical trial. The selected patients were orally administered one sachet two times daily (before a meal) for 40 consecutive days.                                                                                                                           | Each PHF sachet (6.4 g) consisted of a combination of 300 mg A. sativum, 300 mg A. vera, 1.8 g N. sativa, 1 g P. psyllium, 2.5 g T. foenum-graecum, and 500 mg S. marianum extract. All subjects also continuously received their statins and oral hypoglycemic | 40 days                                                   | 78 ± 12                         | 77 ± 12                         | 162 ± 40        | 146 ± 37*                        | 8.4 ± 1.5   | 7.7 ± 1.1*   | NR                           | NR                              | 0.393 |

|                                       |    |                                                                                                                                                            |              |                 |                                                                                                                                                                                                                                                                                                                    |                                                                                                                                                                                                                    |                       |                           |                                    |                          |                                   |                |                                      |               |               |       |       |
|---------------------------------------|----|------------------------------------------------------------------------------------------------------------------------------------------------------------|--------------|-----------------|--------------------------------------------------------------------------------------------------------------------------------------------------------------------------------------------------------------------------------------------------------------------------------------------------------------------|--------------------------------------------------------------------------------------------------------------------------------------------------------------------------------------------------------------------|-----------------------|---------------------------|------------------------------------|--------------------------|-----------------------------------|----------------|--------------------------------------|---------------|---------------|-------|-------|
|                                       |    | o liver disease were excluded                                                                                                                              |              |                 |                                                                                                                                                                                                                                                                                                                    | agents.                                                                                                                                                                                                            |                       |                           |                                    |                          |                                   |                |                                      |               |               |       |       |
| Rao <i>et al.</i> , 2020              | 40 | 15 Obese; 9 T2DM; 16 T2DM with obesity. Obese was defined as BMI>25 kg/m². T2DM was defined as FBS >110 mg/dL and/or Hb1Ac>6%                              | 5<br>(33.3)  | 37.0<br>(32–42) | Exploratory, interventional, single-arm trial. Results were obtained depending on their clinical characteristics: Obese, T2D or T2D + obesity                                                                                                                                                                      | All patients received a wheat flour chapatis, fortified to provide, respectively, 4.7 and 0.75 g powdered Black cumin and fenugreek seed/day                                                                       | 84 days               | 74.1 ± 1.98               | Week change -2.12 (-3.13 to -1.10) | 92.9 ± 1.99              | Week change -6.95 (-15.0 to 1.05) | 5.29 ± 0.0661  | Week change -5.65 (-8.59 to -2.85) * | NR            | NR            | 0.738 |       |
|                                       |    |                                                                                                                                                            | 0 (0)        | 54.4<br>(42–63) |                                                                                                                                                                                                                                                                                                                    |                                                                                                                                                                                                                    |                       | 69.4 ± 1.88               |                                    | 137 ± 15.1               |                                   | 7.92 ± 0.398   |                                      | NR            | NR            |       |       |
|                                       |    |                                                                                                                                                            | 5<br>(32.3)  | 54.2<br>(41–72) |                                                                                                                                                                                                                                                                                                                    |                                                                                                                                                                                                                    |                       | 74.5 ± 3.22               |                                    | 164 ± 11.3               |                                   | 7.97 ± 0.392   |                                      | NR            | NR            |       |       |
| Banerji <i>et al.</i> , 2016          | 50 | T2DM not insulin dependent, age 30-60 years, HbA1c: 7.5% - 10%. Patients with chronic disease, alcohol drinkers and pregnant/lactating women were excluded | 20 (40)      | 50.62<br>(7.48) | Prospective, single arm, open label investigation trial. Of total recruited patients, only 35 completed the study                                                                                                                                                                                                  | Capsules contained 350 mg total extracts of fenugreek (Trigonella foenum-graecum, 110 mg), Indian gooseberry (Emblica officinalis, 90 mg), turmeric (Curcuma longa, 70 mg) and grape seed (Vitis vinifera, 80 mg). | 84 days               | 27.14<br>(4.15)<br>kg/m²† | 26.59<br>(3.98)<br>kg/m²†          | 9.19<br>(1.92)<br>mmol/L | 8.15<br>(2.78)<br>mmol/L          | 8.70<br>(0.87) | 8.13<br>(1.39) *                     | NR            | NR            | 0.378 |       |
| Faizal <i>et al.</i> , 2009           | 43 | T2DM subjects                                                                                                                                              | NR           | 35-75           | Intervention study where patients were divided into 6 groups based on their age group and also according to the mean FBS values. As control group normal healthy subjects were taken. All groups received a tablet which contains: Salacia oblonga wall-250 mg, Curcuma longa L-125 mg, Emblica officinalis-125 mg | Group I -Normal Control Subjects (n=10)                                                                                                                                                                            | 84 days               | NR                        | NR                                 | 87.521 ± 9.44            | NR                                | 5.50 ± 0.22    | NR                                   | 22.72 ± 6.19  |               | 0.265 |       |
|                                       |    |                                                                                                                                                            | NR           | 35-45           |                                                                                                                                                                                                                                                                                                                    | Group II - 35-45 years (n=15)                                                                                                                                                                                      |                       | NR                        | NR                                 | 168.19 ± 56.55           | 142.10 ± 41.74 *                  | 8.3 ± 3.7      | 6.71 ± 2.17*                         | 18.3 ± 6.88   | 26.27 ± 5.94* |       |       |
|                                       |    |                                                                                                                                                            | NR           | 46-55           |                                                                                                                                                                                                                                                                                                                    | Group III - 46-55 years (n=13)                                                                                                                                                                                     |                       | NR                        | NR                                 | 148.82± 34.61            | 124.53±3.34                       | 7.754±2.93     | 5.875±1.26                           | 15.53±6.03    | 23.72±5.41    |       |       |
|                                       |    |                                                                                                                                                            | NR           | >55             |                                                                                                                                                                                                                                                                                                                    | Group IV - > 55 years (n=15)                                                                                                                                                                                       |                       | NR                        | NR                                 | 148.01± 36.03            | 122.953±27.16*                    | 7.267±2.64     | 6.239±1.21                           | 16.333± 6.67  | 24.227± 6.35* |       |       |
|                                       |    |                                                                                                                                                            | NR           | NR              |                                                                                                                                                                                                                                                                                                                    | Group V - FBS < 145.9 mg/dl (n=21)                                                                                                                                                                                 |                       | NR                        | NR                                 | 121.39± 9.78*            | 104.40±15.53                      | 5.83±1.06      | 5.39±0.52 *                          | 17.71±7.10    | 25.08±6.38*   |       |       |
|                                       |    |                                                                                                                                                            | NR           | NR              |                                                                                                                                                                                                                                                                                                                    | Group VI - FBS > 145.9 mg/dl (n=22)                                                                                                                                                                                |                       | NR                        | NR                                 | 171.45± 20.58            | 141.87±23.11*                     | 9.53±3.68      | 7.03±2.05 *                          | 15.541± 6.08  | 24.50±5.94*   |       |       |
| Ferreira de Sousa <i>et al.</i> ,2020 | 89 | T2DM subjects not-insulin therapy, age>18 years. Patients with immunosuppression and chronic disease were excluded                                         | 5<br>(17.9)  | NR              | Participants were randomized in three groups: one supplemented with turmeric and piperine; other supplemented with passion fruit albedo and another one with control group.                                                                                                                                        | Group CURPI (N=33): received capsules of long turmeric (500 mg) and piperine 5mg once a day, 60 minutes before lunch                                                                                               | 112 days              | 74.07 ± 13.88             | 73.98 ± 13.74                      | 203.97 ± 103.64          | 197.33 ± 118.53*                  | 8.64 ± 2.99    | 8.57 ± 2.90*                         | 12.24 ± 11.16 | 12.18 ± 7.90  | 0.768 |       |
|                                       |    |                                                                                                                                                            | 10<br>(30.3) | NR              |                                                                                                                                                                                                                                                                                                                    | Group FAMA (N=28): received 500 mg of flour obtained from the rind of the yellow passion fruit                                                                                                                     |                       | 75.02 ± 17.9              | 73.8 ± 13.8                        | 172.93 ± 83.73           | 162.68 ± 74.88*                   | 7.91 ± 2.37    | 7.84 ± 2.31*                         | 12.80 ± 10.59 | 12.93 ± 8.11  |       |       |
|                                       |    |                                                                                                                                                            | 4<br>(14.3)  | NR              |                                                                                                                                                                                                                                                                                                                    | Control group (N=28): did not receive any supplementation                                                                                                                                                          |                       | 67.98 ± 12.4              | 67.98 ± 11.2                       | 138.75 ± 77.01           | 151.29 ± 62.95*                   | 7.25 ± 1.60    | 7.21 ± 1.43*                         | 10.50 ± 8.56  | 10.04 ± 6.94  |       |       |
| Iyer <i>et al.</i> , 2010             | 55 | Stable T2DM patients                                                                                                                                       | 12           | 52±6            | Intervention study with 3-arms. Patients were divided in three groups:                                                                                                                                                                                                                                             | Control group (N=20): no                                                                                                                                                                                           | Subjects with FBS>150 | 90 days                   | 71.17 ± 5.98                       | NR                       | 199.60± 40.22                     | 189.85±54.45*  | 9.46±0.90                            | 9.10±1.08     | NR            | NR    | 0.480 |

|                                    |    |                                                                                                                                                                                            |           |              |                                                                                                                                                                                                            |                                                                                                                                                                                                                                                                                                                                     |                       |          |                                                                                    |                                   |                |                 |             |              |    |    |       |
|------------------------------------|----|--------------------------------------------------------------------------------------------------------------------------------------------------------------------------------------------|-----------|--------------|------------------------------------------------------------------------------------------------------------------------------------------------------------------------------------------------------------|-------------------------------------------------------------------------------------------------------------------------------------------------------------------------------------------------------------------------------------------------------------------------------------------------------------------------------------|-----------------------|----------|------------------------------------------------------------------------------------|-----------------------------------|----------------|-----------------|-------------|--------------|----|----|-------|
|                                    |    |                                                                                                                                                                                            |           |              | control, fresh and processed group. Both fresh and processed supplementation was a mix of herbs, which included amla, tulsi, mint, ginger and turmeric. Results was reported depending on their FBS values | supplementat ion.                                                                                                                                                                                                                                                                                                                   | Subjects with FBS<150 |          |                                                                                    |                                   | 115.31± 17.55  | 125.51±18 .08   | 6.63±1.76   | 7.32±0.59    | NR | NR |       |
|                                    |    |                                                                                                                                                                                            | 11        | 61±7         |                                                                                                                                                                                                            | <u>Fresh group (N = 15)</u> 150ml of fresh panchratna (30g pulp) juice daily                                                                                                                                                                                                                                                        | Subjects with FBS>150 | 45 days  | 69.18 ± 4.73                                                                       | NR                                | 201.48± 38.5   | 183.03±50 .2    | 8.92±1.18   | 8.40±1.36    | NR | NR |       |
|                                    |    |                                                                                                                                                                                            |           |              |                                                                                                                                                                                                            |                                                                                                                                                                                                                                                                                                                                     | Subjects with FBS<150 |          |                                                                                    |                                   | 122.7±1 1.73   | 118±16.20       | 6.96±0.26   | 6.93±0.29    | NR | NR |       |
|                                    |    |                                                                                                                                                                                            | 14        | 60±8         |                                                                                                                                                                                                            | <u>The processed group (N=20)</u> bottled with 30g of panchratna pulp                                                                                                                                                                                                                                                               | Subjects with FBS>150 | 90 days  | 68.71 ± 8.02                                                                       | NR                                | 245.77± 50.85  | 193.76±42 .06   | 10.02±1.4 5 | 9.21±1.16    | NR | NR |       |
|                                    |    |                                                                                                                                                                                            |           |              |                                                                                                                                                                                                            | Subjects with FBS<150                                                                                                                                                                                                                                                                                                               | 125.67± 12.77         |          |                                                                                    |                                   | 121.25±17 .24  | 7.35±0.72       | 7.13±0.41   | NR           | NR |    |       |
| <b>Kurian <i>et al.</i>, 2014</b>  | 89 | T2DM subjects with age 35-60 years, all patients must be under medical treatment, but showing FBS > 140 mg/dl. Patients with HbA1c>9.2%, chronic disease or pregnancy women were excluded. | 50 (56.2) | 35-60 years  | Randomized case control study. All subjects were randomly assigned to receive treatment with G-400 and were asked to continue their usual treatment regimen for diabetes mellitus along with G-400.        | Each patient was asked to take 100mg G-400                                                                                                                                                                                                                                                                                          |                       | 56 days  | 24.5 ± 3.9 kg/m <sup>2</sup> † in male<br>25.7 ± 4.1 kg/m <sup>2</sup> † in female | NR                                | 184.84         | 127*            | 8.58        | 7.98*        | NR | NR | 0.378 |
| <b>Mahajan <i>et al.</i>, 2015</b> | 32 | T2DM non-insulin dependent diabetes subjects, ages of 30-65 years, BMI 18.5 to 40. Patients with another chronic disease, high alcohol intake, smokers and T1D were excluded               | 27        | 55.59± 1.47  | Intervention study. All patients were asked to avoid a carbohydrate rich diet and advised regular walking for about 4-5 km during the course of study                                                      | “GSPF” consisted of a mixture of 10 herbs (Gymnema sylvestre, Syzygium cumini, Phyllanthus emblica, Curcuma longa, Pterocarpus marsupium, Terminalia chebula, Cassia fistula, Picrorhiza kurroa, Swertia chirata and Terminalia bellerica).10 g polyherbal powder was soaked in 50 ml of water and administered in an empty stomach |                       | 168 days | 25.18 ± 0.70 kg/m <sup>2</sup> †                                                   | 24.27 ± 0.72* kg/m <sup>2</sup> † | 168.23 ± 5.35  | 128.70 ± 4.24*  | 7.21 ± 0.12 | 6.37 ± 0.09  | NR | NR | 0.467 |
| <b>Mani <i>et al.</i>, 1997</b>    | 38 | T2DM non-insulin dependent                                                                                                                                                                 | 15 (50)   | 54.00 ± 7.40 | Intervention trial. All patients were divided in two groups: intervention and control group                                                                                                                | <u>Intervention group (N=30):</u> received 80 mg of cereal mix, which included 0.3g Turmeric/100g                                                                                                                                                                                                                                   |                       | 2 months | 61.50 ± 5.70                                                                       | NR                                | 9.26 ± 2.89    | 6.54 ± 2.79*    | NR          | NR           | NR | NR | 0.273 |
|                                    |    |                                                                                                                                                                                            | 8 (100)   | 52.75 ± 3.14 |                                                                                                                                                                                                            | <u>Control group (N=8):</u> did not receive supplementation                                                                                                                                                                                                                                                                         |                       |          | 60.75 ± 1.54                                                                       | NR                                | 8.64 ± 0.70    | 8.58 ± 0.62     | NR          | NR           | NR | NR |       |
| <b>Singh <i>et al.</i>, 2016</b>   | 56 | T2DM not-insulin dependent, age 30-70 years. Uncontrolled                                                                                                                                  | NR        | 30-70 years  | Conduct clinical trial study. All the diagnosed patients were divided                                                                                                                                      | Group A (N=36): Chanaka Yoga (chickpea, curcumin, berberine, chebula, baheda,                                                                                                                                                                                                                                                       |                       | 90 days  | NR                                                                                 | NR                                | 157.74 ± 24.45 | 112.55 ± 12.38* | 8.82 ± 1.20 | 7.32 ± 0.64* | NR | NR | 0.308 |

|                                        |    |                                                                                                                                   |           |              |                                                                                                                                                                                                                |                                                                                                                                                                                                                                  |                                    |                                  |                                  |                   |                       |                                                                                                     |              |                      |                       |       |  |  |
|----------------------------------------|----|-----------------------------------------------------------------------------------------------------------------------------------|-----------|--------------|----------------------------------------------------------------------------------------------------------------------------------------------------------------------------------------------------------------|----------------------------------------------------------------------------------------------------------------------------------------------------------------------------------------------------------------------------------|------------------------------------|----------------------------------|----------------------------------|-------------------|-----------------------|-----------------------------------------------------------------------------------------------------|--------------|----------------------|-----------------------|-------|--|--|
|                                        |    | DM, another chronic disease and pregnancy women were excluded.                                                                    |           |              | into two groups (Group A, Group B), Group A: Supplemented with a species mix named Chanaka Yoga group and Group B: Glimepiride treated                                                                         | Indian gooseberry) 10 g 1 time a day before meal                                                                                                                                                                                 |                                    |                                  |                                  |                   |                       |                                                                                                     |              |                      |                       |       |  |  |
|                                        |    |                                                                                                                                   | NR        |              |                                                                                                                                                                                                                | <u>Group B (N=20):</u> Glimepiride (1 mg) drug was given 2 times a day before meal                                                                                                                                               |                                    | NR                               | NR                               | 137.10 ± 10.67    | 114.60 ± 7.60         | 8.13 ± 0.96                                                                                         | 7.68 ± 0.66* | NR                   | NR                    |       |  |  |
| <b>Sukandar <i>et al.</i>, 2010</b>    | 32 | T2DM subjects with dyslipidaemia, aged 35-75 years. Another chronic disease and women pregnancy were excluded                     | 10 (90.9) | 59.3 (6.83)  | Double blind, randomized study. Patients were randomized in three groups: A, B or C. Patients have regular visit every two weeks                                                                               | <u>Group A (N=11):</u> received 1.2 g of allium-curcuma                                                                                                                                                                          | 84 days                            | 25.5 (3.26)                      | 24.8 (3.21)                      | 117.6 (52.1)      | 146 (52.7)            | 10.1 (3.04)                                                                                         | NR           | NR                   | NR                    | 0.462 |  |  |
|                                        |    |                                                                                                                                   | 9 (90.0)  | 54.4 (4.36)  |                                                                                                                                                                                                                | <u>Group B (N=10):</u> received 1.6 g of allium-curcuma                                                                                                                                                                          |                                    | 27.6 (4.83)                      | 26.7 (4.52)                      | 177.2 (45.0)      | 157 (34.4)            | 9.60 (1.69)                                                                                         | NR           | NR                   | NR                    |       |  |  |
|                                        |    |                                                                                                                                   | 8 (72.7)  | 54.5 (8.40)  |                                                                                                                                                                                                                | <u>Group C (N=11):</u> received 2.4 g of allium-curcuma                                                                                                                                                                          |                                    | 29.2 (3.46)                      | 27.9 (3.56)                      | 175.1 (51.0)      | 139.4 (57.9)          | 11.48 (1.47)                                                                                        | NR           | NR                   | NR                    |       |  |  |
| <b>Sukandar <i>et al.</i>, 2014</b>    | 29 | T2DM subjects, older than 35 years old and with or without dyslipidemia                                                           | NR        | 53.12 ± 2.11 | Double blind, parallel, randomized control trial. All patients were divided in two groups: group AC received Allium Curcuma while group G received Glibenclamide                                               | <u>Group AC (N=17):</u> received was 400 mg capsule contains 200 mg of turmericethanolic extract and 200 mg of garlic aqueous extract per day                                                                                    | 14 weeks                           | 25.80 ± 1.05 kg/m <sup>2</sup> † | 24.77 ± 1.00 kg/m <sup>2</sup> † | 192.76 ± 14.59    | 141.71 ± 9.67*        | 10.41 ± 0.64                                                                                        | 8.09 ± 0.37* | 56.89 ± 14.40 pmol/L | 47.64 ± 12.34* pmol/L | 0.487 |  |  |
|                                        |    |                                                                                                                                   | NR        | 52.83 ± 2.26 |                                                                                                                                                                                                                | <u>Group C (N=12):</u> received 5 mg Glibenclamide per day                                                                                                                                                                       |                                    | 24.70 ± 1.43 kg/m <sup>2</sup> † | 25.54 ± 1.40 kg/m <sup>2</sup> † | 250.33 ± 14.55    | 154.50 ± 24.06*       | 11.86 ± 0.53                                                                                        | 7.86 ± 0.45* | 59.98 ± 17.83 pmol/L | 59.68 ± 14.05* pmol/L |       |  |  |
| <b>Viswanathan <i>et al.</i>, 2016</b> | 50 | T2DM subjects with more than 10 years duration and aged between 40 and 70 years, who had symptoms of peripheral neuropathic pain  |           |              | Randomized controlled trial. The patients were randomly assigned to two groups: group 1 treated with the polyherbal formulation pain cream and group 2 or control group patients treated with a placebo cream. | <u>Group 1 (N=26):</u> patients were treated with the polyherbal formulation pain cream (Glycyrrhiza glabra 0.20%, Musa paradisiaca 19.42%, Curcuma longa 2.43%, Pandanus odoratissimus 9.70%, aloe vera 4.85% and coconut milk) | 168 days                           | NR                               | NR                               | NR                | NR                    | HbA1c values were significantly different through the baseline, until the final follow-up (p<0.005) |              | NR                   | NR                    | 0.285 |  |  |
|                                        |    |                                                                                                                                   |           |              |                                                                                                                                                                                                                | <u>Group 2 (N=24):</u> patients were treated with a placebo cream                                                                                                                                                                |                                    | NR                               | NR                               | NR                | NR                    | The mean HbA1c values were not significantly different through the baseline                         |              | NR                   | NR                    |       |  |  |
| <b>Carvalho <i>et al.</i>, 2020</b>    | 21 | T2DM subjects with oral diabetic drugs, age 18-80 years, Hb1Ac 7-10%. Pregnancy and patients with T2D complications were excluded | 7 (33.4)  | 57.9 ± 9.22  | Randomized double-blind and placebo-controlled pilot study. All participants were randomized in two groups: placebo and intervention                                                                           | <u>Placebo group (N=11)</u> received two capsules per day of 600 mg/each, with microcrystalline cellulose (placebo).                                                                                                             | 30 days                            | 70.5 (59.2 - 95.7)               | 69.8 (57.8 - 97.1)               | 223.2 (135 - 369) | 226.8 (136.8 - 363.6) | NR                                                                                                  | NR           | NR                   | NR                    | 0.832 |  |  |
|                                        |    |                                                                                                                                   |           |              |                                                                                                                                                                                                                | <u>Intervention group (N=10):</u> received two capsules per day of 600 mg/each, with ginger.                                                                                                                                     |                                    | 75.1 (46 - 90.3)                 | 74.4 (46.3 - 89.5) *             | 198 (117 -318.6)  | 223.2 (111.6 - 261)   | NR                                                                                                  | NR           | NR                   | NR                    |       |  |  |
| <b>Fouad <i>et al.</i>, 2016</b>       | 72 | T2DM Women. Insulin injection, lipid lowering medications, thyroid dysfunction, allergy to soya, family                           | 0 (0)     | 46.53± 1.70  | Intervention study with 2-arm. The study has two phases: phase 1 following low caloric balanced diet +                                                                                                         | <u>Group A (N=38):</u> At phase 1, followed a low caloric balanced diet + soya bean flour mixed with 5% turmeric powder.                                                                                                         | 56 days (28 days at phase 1 and 28 | 93.03 ± 3.11                     | 89.03 ± 3.03*                    | 112.87 ± 4.66     | 99.53 ± 3.89 *        | 5.95 ± 0.14                                                                                         | 4.93 ± 0.09  | NR                   | NR                    | 0.380 |  |  |

|                                      |     |                                                                                                                                                                                                                                                                                                                     |           |              |                                                                                                                                                                                                                                                                                                                                           |                                                                                                                                                                                                            |                  |                                                                                                           |                                                                                              |                                                                                                |                    |                           |                           |                        |    |       |
|--------------------------------------|-----|---------------------------------------------------------------------------------------------------------------------------------------------------------------------------------------------------------------------------------------------------------------------------------------------------------------------|-----------|--------------|-------------------------------------------------------------------------------------------------------------------------------------------------------------------------------------------------------------------------------------------------------------------------------------------------------------------------------------------|------------------------------------------------------------------------------------------------------------------------------------------------------------------------------------------------------------|------------------|-----------------------------------------------------------------------------------------------------------|----------------------------------------------------------------------------------------------|------------------------------------------------------------------------------------------------|--------------------|---------------------------|---------------------------|------------------------|----|-------|
|                                      |     | history of cancer breast, pregnant or breast-feeding females were excluded                                                                                                                                                                                                                                          |           |              | supplementation and phase 2 only following a low caloric balanced diet. Patients were divided in two groups (A and B)                                                                                                                                                                                                                     | Group B (N=34): low caloric balanced diet + bread formula with soya bean flour mixed with 5% turmeric powder.                                                                                              | days at phase 2) | 87.24 ± 1.70                                                                                              | 84.44 ± 1.72*                                                                                | 119.58 ± 5.48                                                                                  | 103.19 ± 4.77*     | 6.17 ± 0.1                | 4.87 ± 0.08               | NR                     | NR |       |
| Majeed <i>et al.</i> , 2021          | 69  | Prediabetic and newly diagnosed T2DM, aged 30-65 years. Prediabetes was defined as HbA1c 5.7–6.4% and FBS between 100 mg/dL to 125 mg/dL. T2DM was defined as HbA1c value of 6.5–7.5% and FBS > 125 mg/dL. Pregnant and lactating women, patients with a history of acute or chronic illness and T1DM were excluded | 9         | 49.6         | Prospective, randomized, double-blind, active-controlled clinical trial. Enrolled patients were initially segregated into prediabetic patients and newly diagnosed diabetic patients. All the enrolled patients were randomized to two treatment groups: Treatment 1: GlycaCare-II as active or Treatment 2: Metformin as the comparator. | Prediabetic subject treatment I (N=17): received GlycaCare-II (522.5 mg), which containing cinnamon, bitter melon, Indian kino, Periploca of the Woods, Salacia, jambul and a piper nigrum                 | 120 days         | No significant differences in body weigh at the beginning and the end of the study in each of four groups | Significant decrease in FBS at the beginning and the end of the study in each of four groups | Significant decrease in Hb1Ac at the beginning and the end of the study in each of four groups | NR                 | NR                        | 0.643                     |                        |    |       |
|                                      |     |                                                                                                                                                                                                                                                                                                                     | 3         | 48           |                                                                                                                                                                                                                                                                                                                                           | Prediabetic subjects' treatment II (N=12): received metformin (500)                                                                                                                                        |                  |                                                                                                           |                                                                                              |                                                                                                | NR                 | NR                        |                           |                        |    |       |
|                                      |     |                                                                                                                                                                                                                                                                                                                     | 17        | 51.3         |                                                                                                                                                                                                                                                                                                                                           | T2D subject treatment I (N=24): received GlycaCare-II (522.5 mg)                                                                                                                                           |                  |                                                                                                           |                                                                                              |                                                                                                | NR                 | NR                        |                           |                        |    |       |
|                                      |     |                                                                                                                                                                                                                                                                                                                     | 14        | 52.9         |                                                                                                                                                                                                                                                                                                                                           | T2D subjects' treatment II (N=16): received metformin (500 mg)                                                                                                                                             |                  |                                                                                                           |                                                                                              |                                                                                                | NR                 | NR                        |                           |                        |    |       |
| Nganou-Gnindjio <i>et al.</i> , 2022 | 21  | T2DM subjects without changes in drugs therapy, aged above 21 years, with Hb1Ac 42-64 mmol/L. and chronic patients were excluded.                                                                                                                                                                                   | NR        | 54 [51-61]   | Single-arm clinical trial. Data were collected during three visits: baseline, 21-day and 42-day follow-up.                                                                                                                                                                                                                                | Each participant received a capsule containing 399 mg of pure Zingiber officinale extracts three times per day for six weeks                                                                               | 42 days          | 31.1 [26.5-37.6] kg/m <sup>2†</sup>                                                                       | 30 [26.5-37.6] kg/m <sup>2†</sup>                                                            | 6.6 [5.5-8.5] mmol/l                                                                           | 7.5 [6.9-8] mmol/l | 49.7 [47.0-57.4] mmol/mol | 44.3 [38.8-53] * mmol/mol | NR                     | NR | 0.587 |
| Yu <i>et al.</i> , 2018              | 450 | Newly T2DM not-insulin diagnosed subjects, with Hb1Ac>7%, TG>1.7 mmol/L and TG< 5.65 mmol/L, age 18-70 years. Patients with lipid-lowering drugs and diabetic complications were excluded                                                                                                                           | 104       | 52.82 ± 9.01 | Multicentre randomized, positive-controlled, open-label clinical trial. All participants were randomized in two groups: JTTZ and metformin group. 225 subjects started in each group. Although only 215 and 199 participants in each group completed the study                                                                            | JTTZ group (N=215): received a supplementation with 8 herbs (aloe vera, coptis chinensis, rhizoma anemarrhenae, red yeast rice, momordica charantia, salvia miltiorrhiza, schisandra chinensis and ginger) | 84 days          | 77.82 ± 12.08                                                                                             | 75.34 ± 12.05                                                                                | 9.64 ± 2.59 mmol/L                                                                             | 8.24 ± 2.35 mmol/L | 8.26 ± 1.35               | 7.51 ± 1.44 *             | 103.89 ± 97.73 pmol/L  | NR | 0.642 |
|                                      |     |                                                                                                                                                                                                                                                                                                                     | 98        | 52.90 ± 8.52 |                                                                                                                                                                                                                                                                                                                                           | Metformin group (N=199)                                                                                                                                                                                    |                  | 76.86 ± 12.06                                                                                             | 74.83 ± 12.00                                                                                | 9.56 ± 2.39 mmol/L                                                                             | 8.21 ± 2.23 mmol/L | 8.28 ± 1.33               | 7.57 ± 1.42 *             | 100.88 ± 131.62 pmol/L | NR |       |
| Blenvis <i>et al.</i> , 2007         | 57  | T2DM not-insulin dependent. Patients with Hb1Ac<6% and chronic disease were excluded                                                                                                                                                                                                                                | 28 (49.1) | 63.6         | Randomized clinical trial. Enrolled subjects were stratified by sex and randomized to receive either cinnamon                                                                                                                                                                                                                             | Placebo group (N=28): received two capsules per day. Each capsule contained 500 mg of placebo.                                                                                                             | 84 days          | 32.5 ± 1.7                                                                                                | NS                                                                                           | 132.9 ± 9.3                                                                                    | NS                 | 7.2 ± 0.3                 | NS                        | 12.9 ± 1.3             | NS | 0.404 |
|                                      |     |                                                                                                                                                                                                                                                                                                                     |           | 58.0         |                                                                                                                                                                                                                                                                                                                                           | Cinnamon group (N=29): received two capsules per                                                                                                                                                           |                  | 32.0 ± 1.5                                                                                                | NS                                                                                           | 144.7 ± 10.4                                                                                   | NS                 | 7.1 ± 0.2                 | NS                        | 11.8 ± 1.6             | NS |       |

|                                    |     |                                                                                                                                                                       |           |              |                                                                                                                                                                                   |                                                                                                                                      |         |               |                           |                                                             |                          |                                                             |                          |                                                             |                          |       |  |
|------------------------------------|-----|-----------------------------------------------------------------------------------------------------------------------------------------------------------------------|-----------|--------------|-----------------------------------------------------------------------------------------------------------------------------------------------------------------------------------|--------------------------------------------------------------------------------------------------------------------------------------|---------|---------------|---------------------------|-------------------------------------------------------------|--------------------------|-------------------------------------------------------------|--------------------------|-------------------------------------------------------------|--------------------------|-------|--|
|                                    |     |                                                                                                                                                                       |           |              | (C. cassia) or placebo (wheat flour).                                                                                                                                             | day. Each capsule contained 500 mg of cinnamon (1000 mg of cinnamon per day)                                                         |         |               |                           |                                                             |                          |                                                             |                          |                                                             |                          |       |  |
| Mirmiran <i>et al.</i> , 2019      | 41  | Newly diagnosed T2DM subjects, FBS>180 and <250 mg/dL, BMI 18.5- 30 kg/m <sup>2</sup> , without insulin therapy. Patients with chronic disease were excluded.         | 8 (40%)   | 58.90 ± 7.93 | Randomized double-blind placebo-controlled trial. The selected patients were randomly divided into two groups: cinnamon or placebo group                                          | Cinnamon group (N=19): received three capsules Daily (3 g cinnamon/day)                                                              | 56 days | 73.75 ± 10.74 | NR                        | No significant difference between pre and post intervention |                          | No significant difference between pre and post intervention |                          | No significant difference between pre and post intervention |                          | 0.803 |  |
|                                    |     |                                                                                                                                                                       | 7 (36.8)  | 56.26 ± 9.46 |                                                                                                                                                                                   | Placebo group (N=22): received three capsules of microcrystalline cellulose as placebo daily                                         |         | 77.15 ± 15.63 | NR                        | No significant difference between pre and post intervention |                          | No significant difference between pre and post intervention |                          | No significant difference between pre and post intervention |                          |       |  |
| Mirmiranpour <i>et al.</i> , 2020  | 136 | T2DM not-insulin therapy subjects, age 40-60 years, FBS: 125-250 mg/dL and Hb1Ac 7-8%. Pregnancy, consumption of specific medicines or chronic disease were excluded. | 13        | 58.4 ± 11.4  | Randomized placebo-controlled and 4 arm trial. All participants were randomly divided into four groups matched for age and gender: A, B, C or D group                             | Group A (N=30): received a capsule of Lactobacillus acidophilus 10 <sup>8</sup> cfu and 0.5 g/day of cinnamon.                       | 84 days | 79.5 ± 11.8   | NR                        | NR                                                          | 147.7± 3.71**            | NR                                                          | 7.66 ± 1.11**            | NR                                                          | NR                       | 0.660 |  |
|                                    |     |                                                                                                                                                                       | 10        | 59.7 ± 12.2  |                                                                                                                                                                                   | Group B (N=30): received a capsule of Lactobacillus acidophilus 10 <sup>8</sup> cfu                                                  |         | 79.3 ± 13.3   | NR                        | NR                                                          | 150.43 ±43.36**          | NR                                                          | 7.42 ± 1.23**            | NR                                                          | NR                       |       |  |
|                                    |     |                                                                                                                                                                       | 14        | 58.8 ± 12.8  |                                                                                                                                                                                   | Group C (N=28): received 0.5 g/day of cinnamon                                                                                       |         | 81.6 ± 12.6   | NR                        | NR                                                          | 152.5± 48.1**            | NR                                                          | 7.68 ± 0.83**            | NR                                                          | NR                       |       |  |
|                                    |     |                                                                                                                                                                       | 12        | 58.2 ± 11.8  |                                                                                                                                                                                   | Group D (N=27): received a capsule (0.5 g/day) of rice flour                                                                         |         | 83.5 ± 13.6   | NR                        | NR                                                          | 177.3 ± 23.02            | NR                                                          | 8.48 ± 0.59              | NR                                                          | NR                       |       |  |
| Tanzidi-Roodi <i>et al.</i> , 2023 | 30  | T2DM not-insulin therapy subjects, age 40-75 years, BMI 25-35 kg/m <sup>2</sup> . Pregnancy, consumption of specific medicines or chronic disease were excluded       | 6 (40)    | 57.20 ±7.95  | Randomized, triple-blind, placebo-controlled clinical trial. All patients were randomized in two groups: intervention or placebo                                                  | Intervention group (N=15): received 500 mg of Viabet® capsules which containing fenugreek, nettle, cinnamon, stevia and aconite bean | 84 days | 83.30 ±9.20   | 81.7 ± 8.98*              | 164.2 ±55.63                                                | 162.8 ±55.31             | 7.59 ± 1.69                                                 | 6.40 ± 1.45*             | NR                                                          | NR                       | 0.821 |  |
|                                    |     |                                                                                                                                                                       | 4 (26.7)  | 55.20 ±6.26  |                                                                                                                                                                                   | Placebo group (N=15): received placebo capsule                                                                                       |         | 75.60 ±7.98   | 75.7 ± 8.17               | 132.6 ± 75.04                                               | 144 ± 81.79              | 6.35 ± 1.37                                                 | 7.26 ± 1.43              | NR                                                          | NR                       |       |  |
| Wainstein <i>et al.</i> , 2011     | 59  | T2DM not-insulin therapy subjects, older 30 years, Hb1Ac 6.5 – 10.5%. Pregnancy, patients with known sensitivity to cinnamon or chronic disease were excluded         | 14 (48.3) | 61.7 – 6.3   | Single-center randomized, placebo-controlled clinical trial. All participants were randomized in two groups: cinnamon or placebo                                                  | Cinnamon group (N=29): received 6 capsules per day with 400 mg of cinnamon each capsule (2.4 g cinnamon/day).                        | 84 days | 85.1 ± 15.2   | -0.03 ± 2.2 <sup>1</sup>  | 165.0 ± 35.9                                                | 13.4 ± 38.9 <sup>1</sup> | 8.0 ± 1.2                                                   | 0.61 ± 0.87 <sup>1</sup> | 15.5 ± 10.2                                                 | 0.86 ± 8.03 <sup>1</sup> | 0.821 |  |
|                                    |     |                                                                                                                                                                       | 21 (60)   | 64.4 – 15.4  |                                                                                                                                                                                   | Placebo group (N=30): received 6 capsules per day of placebo capsules, which contained 400 mg of microcrystalline cellulose.         |         | 88.7 ± 20.2   | - 0.22 ± 2.8 <sup>1</sup> | 170.1 ± 46.3                                                | 11.8 ± 47.9 <sup>1</sup> | 8.1 ± 1.1                                                   | 0.30 ± 0.98 <sup>1</sup> | 16.2 ± 16.7                                                 | 16.2 ± 16.7 <sup>1</sup> |       |  |
| Zare <i>et al.</i> , 2018          | 138 | T2DM not-insulin dependent subjects, age 30-80 years, BMI 18-40 kg/m <sup>2</sup> , FBS 126-250 mg/dL                                                                 | 32 (46.3) | 52.1 ± 9.7   | Randomized triple-blinded, placebo-controlled clinical trial. All patients were randomly assigned in four groups: cinnamon (BMI > 27, BMI < 27) and Placebo (BMI > 27, BMI < 27). | Cinnamon group BMI>27 (N=36): received 1000 mg of cinnamon daily                                                                     | 84 days | 75.7 ± 11.6   | -1.90 ±0.26**             | -19.37 ± 2.3**                                              |                          | -0.42 ± 0.06**                                              |                          | -2.38 ± 0.30** mIU/L                                        |                          | 0.933 |  |
|                                    |     |                                                                                                                                                                       |           |              |                                                                                                                                                                                   | -5.8 ± 1.62                                                                                                                          |         |               |                           | -0.93 ± 0.02                                                |                          | -1.07 ± 0.24** mIU/L                                        |                          |                                                             |                          |       |  |
|                                    |     |                                                                                                                                                                       | 43 (62.3) | 53.2 ± 8.5   |                                                                                                                                                                                   | Placebo group BMI>27 (N=37): received 1000 mg of placebo daily                                                                       |         | 74.4 ± 11.6   | 0.19 ± 0.15               | -0.22 ± 1.53                                                |                          | 0.044 ± 0.01                                                |                          | 0.003 ± 0.02 mIU/L                                          |                          |       |  |

|  |  |  |  |  |  |                                                                 |  |  |  |             |               |                    |  |
|--|--|--|--|--|--|-----------------------------------------------------------------|--|--|--|-------------|---------------|--------------------|--|
|  |  |  |  |  |  | Cinnamon group BMI<27 (N=32); received 1000 mg of placebo daily |  |  |  | -3.3 ± 1.02 | -0.048 ± 0.03 | 0.008 ± 0.03 mIU/L |  |
|--|--|--|--|--|--|-----------------------------------------------------------------|--|--|--|-------------|---------------|--------------------|--|

\*denotes a significant difference after intervention or supplementation; \*\*denotes a significant decrease compared to the control group; †indicated change from baseline.  
† indicated BMI, due to body weight was not reported. NR: Not reported.. PA: Physical activity. HIIT: High intensity interval training. HD: hemodialysis; cfu: Colony forming units; T2DM: Type 2 diabetes mellitus; T1DM: Type 1 diabetes mellitus; CVD; Cardiovascular disease; FBS: Fasting blood sugar; TG: Triglycerides, LDL-c; low density lipoprotein cholesterol; eGFR: estimated glomerular filtration rate.



**Supplemental Table 3.** Evaluation of Quality Assessment instruments for randomized controlled trials included in the systematic study.

| Instruments                        | Objective sufficiently described | Study design | Method of subject | Comparison group | Random allocation | Blinding of investigators | Blinding of subjects | Outcome and exposure measure(s) | Sample size | Analytic methods | Estimate of variance | Controlling for confounding | Results reported | Conclusion supported |
|------------------------------------|----------------------------------|--------------|-------------------|------------------|-------------------|---------------------------|----------------------|---------------------------------|-------------|------------------|----------------------|-----------------------------|------------------|----------------------|
| Moghadam <i>et al.</i> , 2021      | ●                                | ●            | ●                 | ●                | ●                 | ○                         | ●                    | ●                               | ◐           | ◐                | ●                    | ◐                           | ◐                | ◐                    |
| Blevins <i>et al.</i> , 2007       | ○                                | ◐            | ○                 | ◐                | ◐                 | ◐                         | ◐                    | ○                               | ○           | ◐                | ◐                    | ○                           | ◐                | ●                    |
| Mirmiran <i>et al.</i> , 2019      | ●                                | ●            | ●                 | ●                | ●                 | ○                         | ●                    | ●                               | ●           | ◐                | ●                    | ○                           | ◐                | ◐                    |
| Mirmiranpour <i>et al.</i> , 2020  | ●                                | ●            | ●                 | ●                | ●                 | ○                         | ○                    | ●                               | ●           | ◐                | ●                    | ○                           | ◐                | ◐                    |
| Tanzidi <i>et al.</i> , 2023       | ●                                | ●            | ●                 | ●                | ●                 | ○                         | ●                    | ●                               | ●           | ◐                | ●                    | ◐                           | ●                | ◐                    |
| Wainstein <i>et al.</i> , 2011     | ●                                | ●            | ◐                 | ●                | ○                 | ○                         | ●                    | ●                               | ●           | ◐                | ●                    | ◐                           | ◐                | ◐                    |
| Zare <i>et al.</i> , 2018          | ●                                | ●            | ●                 | ●                | ●                 | ●                         | ●                    | ●                               | ●           | ◐                | ●                    | ◐                           | ●                | ●                    |
| Ali <i>et al.</i> , 2021           | ◐                                | ◐            | ◐                 | ◐                | ○                 | ○                         | ○                    | ◐                               | ○           | ◐                | ●                    | ○                           | ●                | ○                    |
| Assaad-Khalil <i>et al.</i> , 2022 | ●                                | ●            | ●                 | ●                | ●                 | ●                         | ●                    | ●                               | ●           | ◐                | ●                    | ◐                           | ◐                | ◐                    |
| Bamosa <i>et al.</i> , 2010        | ●                                | ●            | ●                 | ●                | ○                 | ○                         | ○                    | ○                               | ○           | ◐                | ●                    | ◐                           | ◐                | ◐                    |
| Bilal <i>et al.</i> , 2019         | ◐                                | ●            | ◐                 | ○                | ○                 | NA                        | NA                   | ◐                               | ●           | ◐                | ◐                    | ○                           | ◐                | ◐                    |
| El-Shamy <i>et al.</i> , 2011      | ●                                | ●            | ◐                 | ●                | ◐                 | ○                         | ○                    | ◐                               | ○           | ◐                | ●                    | ●                           | ●                | ◐                    |

|                                        |   |   |   |   |    |    |    |   |   |   |   |   |   |   |
|----------------------------------------|---|---|---|---|----|----|----|---|---|---|---|---|---|---|
| Moustafa <i>et al.</i> ,2019           | ● | ● | ● | ● | ●  | ○  | ○  | ● | ○ | ◐ | ● | ◐ | ● | ◐ |
| Rao <i>et al.</i> , 2020               | ● | ◐ | ◐ | ● | NA | NA | NA | ● | ● | ◐ | ● | ◐ | ◐ | ◐ |
| Zarvandi <i>et al.</i> , 2017          | ● | ◐ | ○ | ○ | ○  | ○  | ○  | ◐ | ○ | ◐ | ● | ○ | ◐ | ○ |
| Banerji <i>et al.</i> , 2016           | ◐ | ○ | ○ | ○ | NA | NA | NA | ◐ | ○ | ◐ | ● | ○ | ● | ○ |
| Faiza <i>et al.</i> ,1 2009            | ● | ● | ● | ● | ●  | ●  | ●  | ● | ● | ○ | ● | ○ | ● | ● |
| Ferreira de Sousa <i>et al.</i> , 2020 | ● | ● | ● | ● | ◐  | ◐  | ◐  | ● | ● | ◐ | ● | ◐ | ● | ◐ |
| Iyer <i>et al.</i> , 2010              | ● | ● | ● | ○ | ○  | ○  | ○  | ● | ○ | ○ | ● | ○ | ◐ | ◐ |
| Kurian <i>et al.</i> , 2014            | ◐ | ● | ● | ● | NA | NA | NA | ◐ | ○ | ◐ | ◐ | ● | ● | ◐ |
| Mahajan <i>et al.</i> , 2015           | ◐ | ◐ | ◐ | ◐ | NA | NA | NA | ◐ | ○ | ● | ● | ○ | ● | ◐ |
| Mani <i>et al.</i> , 1997              | ◐ | ◐ | ◐ | ◐ | ○  | ○  | ○  | ● | ○ | ◐ | ◐ | ○ | ◐ | ○ |
| Singh <i>et al.</i> , 2016             | ● | ◐ | ○ | ◐ | ●  | ○  | ○  | ◐ | ○ | ○ | ◐ | ○ | ● | ◐ |
| Sukandar <i>et al.</i> ,2014           | ● | ◐ | ◐ | ◐ | ○  | ○  | ○  | ◐ | ○ | ◐ | ● | ○ | ◐ | ◐ |
| Sukandar <i>et al.</i> , 2010          | ● | ● | ● | ◐ | ○  | ○  | ○  | ◐ | ○ | ◐ | ● | ◐ | ◐ | ◐ |
| Viswanathan <i>et al.</i> , 2016       | ● | ◐ | ● | ● | ○  | ○  | ○  | ● | ○ | ○ | ○ | ○ | ○ | ◐ |
| Carvalho <i>et al.</i> , 2020          | ● | ● | ● | ● | ●  | ●  | ●  | ● | ○ | ● | ◐ | ◐ | ● | ● |

|                                      |   |   |   |   |    |    |    |   |   |   |   |   |   |   |
|--------------------------------------|---|---|---|---|----|----|----|---|---|---|---|---|---|---|
| Foaud <i>et al.</i> , 2016           | ● | ◐ | ◐ | ◐ | ○  | ○  | ○  | ◐ | ○ | ● | ◐ | ○ | ◐ | ◐ |
| Majeed <i>et al.</i> , 2021          | ● | ● | ● | ● | ◐  | ◐  | ◐  | ● | ○ | ◐ | ◐ | ◐ | ◐ | ◐ |
| Nganou-Gnindijo <i>et al.</i> , 2022 | ● | ◐ | ◐ | ● | NA | NA | NA | ● | ● | ◐ | ● | ◐ | ◐ | ◐ |
| Yu <i>et al.</i> , 2018              | ● | ● | ● | ● | ●  | ○  | ○  | ● | ○ | ◐ | ● | ◐ | ● | ◐ |
| Quirarte-baez <i>et al.</i> , 2019   | ◐ | ◐ | ○ | ○ | ○  | ○  | ○  | ◐ | ○ | ○ | ● | ○ | ◐ | ○ |

\* Symbology significance and scoring is as follows: ●Yes (2 points); ◐Partial (1 point); ○No (0 point); NA denotes “Not applicable”; Complete description of the issues included in que quality assessment are: 1) Question, objective sufficiently described?; 2) Study design evident and appropriate?; 3) Method of subject, comparison group selection or source of information, input variables described and appropriate?; 4) Subject and comparison group (if applicable) characteristics sufficiently described?; 5) If interventional and random allocation was possible, was it reported?; 6)If interventional and blinding of investigators was possible, was it reported?; 7) If interventional and blinding of subjects was possible, was it reported?; 8) Outcome and (if applicable) exposure measure(s) well defined and robust to measurement, misclassification bias? Means of assessment reported?; 9) Sample size appropriate?; 10) Analytic methods described, justified and appropriate?; 11) Some estimate of variance is reported for the main results?; 12) Controlling for confounding?; 13) Results reported in sufficient detail?; 14) Conclusion supported by the results?
