# Supplementary material for: Effect of Aromatic Herbs and Spices Present in the Mediterranean Diet on the Glycemic Profile in Type 2 Diabetes Subjects: A Systematic Review and Meta-Analysis
Source: Nutrients. 2024 Mar 7;16(6):756. doi: 10.3390/nu16060756 (PMC10975382; doi:10.3390/nu16060756)
Supplement: Supplementary file 1 [file nutrients-16-00756-s001.zip]

Archive with 7 entries (7 files):
- Supplemental figure S1.JPG
- Supplemental figure S2.JPG
- Supplemental figure S3.JPG
- Supplemental figure S4.JPG
- Supplemental figure S5.JPG
- Supplemental Table S1.pdf
- Supplemental Tables S2 and S3.pdf
